# Supplementary material
Source: Springer Nature journal article supplement (https://www.springermedizin.de/resource/supplementary/12885_2009_1891_MOESM6_ESM.pdf/9461502)

**A****HUVEC**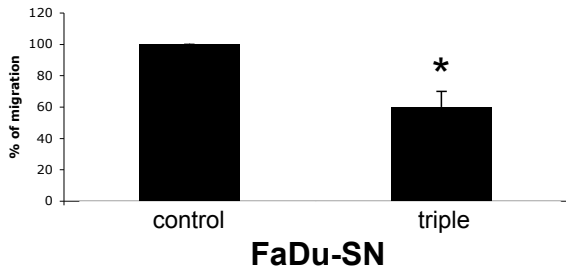**B****HUVEC**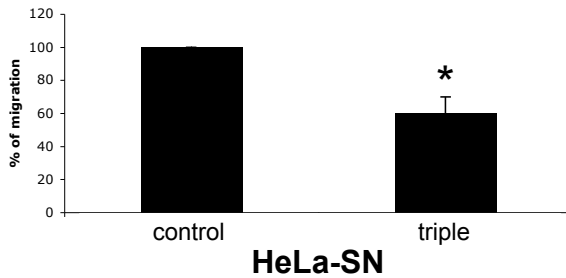\*= $p \leq 0,05$

Supplement: MOESM6 [file 9461502]
